# Supplementary material
Source: PubMed Central journal article supplement (PMC6351740)

1

## Supplemental Material

2 **A LysM domain intervenes in sequential protein-protein**  
3 **and protein-peptidoglycan interactions important for**  
4 **spore coat assembly in *Bacillus subtilis***

5

6

7 Fatima C. Pereira<sup>1, #, ¶</sup>, Filipa Nunes<sup>1, ¶</sup>, Fernando Cruz<sup>1</sup>, Catarina Fernandes<sup>1, &</sup>,  
8 Anabela L. Isidro<sup>1, §</sup>, Diana Lousa<sup>1</sup>, Cláudio M. Soares<sup>1</sup>, Charles P. Moran, Jr.<sup>2</sup>,  
9 Adriano O. Henriques<sup>1</sup> and Mónica Serrano<sup>1, \*</sup>

10

11 <sup>1</sup>Instituto de Tecnologia Química e Biológica António Xavier, Universidade Nova de  
12 Lisboa, Avenida da República, Apartado 127, 2781-901 Oeiras Codex, Portugal; <sup>22</sup>Emory  
13 University School of Medicine, Department of Microbiology and Immunology,  
14 Atlanta GA 30322, USA

15 <sup>¶</sup>Equal contributions.

16 <sup>#</sup>**Present address:** Division of Microbial Ecology, Department of Microbiology and  
17 Ecosystem Science, Research Network Chemistry Meets Microbiology, University of  
18 Vienna, Althanstrasse 14, Vienna, Austria

19 <sup>&</sup>**Present address:** Hovione, 2674 – 506 Loures, Portugal.

20 <sup>§</sup>**Present address:** Fundação para a Ciência e Tecnologia, avenida D. Carlos I, 126,  
21 1249-074 Lisboa, Portugal.

22

23 <sup>\*</sup>**Corresponding authors:** Instituto de Tecnologia Química e Biológica, Universidade  
24 Nova de Lisboa, Avenida da República, Apartado 127, 2781-901 Oeiras Codex, Portugal;  
25 Telephone: +351-21-4469521; Fax: +351-21-4411277; e-mail: [aoh@itqb.unl.pt](mailto:aoh@itqb.unl.pt) or  
26 [serrano@itqb.unl.pt](mailto:serrano@itqb.unl.pt)

27 **Running title:** *Role of a LysM domain in spore morphogenesis*

28 **Keywords:** sporulation, LysM domain, peptidoglycan-binding protein, SpoVID, spore coat,  
29 spore cortex.

## 30 Supplemental Materials and Methods

31 ***B. subtilis* strains expressing *safA* alleles.** We also constructed strains with the in-  
32 frame deletion of *safA* and expressing *safA* alleles from the non-essential locus *amyE*. By  
33 SOE-PCR, we obtained a DNA fragment containing the *safA* coding sequence with an in-  
34 frame deletion that eliminates residues 46-249, as well as *safA* flanking regions (1). The  
35 fragment was digested with Sall and EcoRI and cloned into the same sites of pUC18  
36 (New England Biolabs), yielding pCF72. Then, *B. subtilis* cells were co-transformed with  
37 pDG364 (2) and pCF72 to create a *safA* null mutant strain bearing the chloramphenicol  
38 resistance *cat* gene at *amyE* (AH10297). The presence of the in-frame deletion in *safA*  
39 was confirmed by PCR, and supported by the lysozyme sensitivity of the cells (3). Plasmid  
40 pCF75 is a derivative of pMLK83 (4) with the *safA* coding sequence and its flanking  
41 regions bordered by 5' and 3' regions of *amyE*, was used as template for insertion of  
42 alanine substitutions in LysM residues by site-directed mutagenesis. The resulting  
43 vectors, (pCF181-185) as well as pCF75, were transferred to AH10297, yielding strains  
44 AH10302, AH10555-10558 and AH10561.

45 ***B. subtilis* strains expressing YFP or GFP fusions fusions.** To obtain strains  
46 expressing *safA-yfp* variants, we digested the vector pCF149, containing *safA-fl3-yfp*  
47 fusion (1), with HindIII and BamHI. A DNA fragment with the terminus of *safA* followed by  
48 the linker *fl3* and *yfp* was released and inserted in the same cloning sites of pCF181-185,  
49 yielding vectors pCF186-190. These vectors, as well as pCF149, were then used to  
50 substitute of the *cat* gene for *safA-fl3-yfp* fusion at the *amyE* locus of AH10297,  
51 originating strains AH10487 and AH10562-10566. Also, strains MB24 and AH10297 were  
52 transformed with the chromosomal DNA of JDB1752 (5), in order to knock-out *spoVE*.

53 These cells were then transformed with pCF149 or with chromosomal DNA of PE1478 (6)  
54 generating strains expressing *safA-yfp* or *spoVID-gfp* in the absence of *spoVE*. For cells  
55 expressing *yaaH-gfp* in the presence of the various *safA* alleles, we transformed  
56 AH10297, AH10302 and AH10555-10561 with chromosomal DNA prepared from PE659  
57 (6).

58 **LysM-(GFP) Strep II tag fusions.** The coding sequence of the LysM domain of *safA* was  
59 PCR amplified, digested with XbaI and NcoI, and cloned into the same sites of pASK-  
60 IBA3 (IBA GmbH) to create pTC178. Then, the *gfp* gene, amplified from pEA18, was  
61 inserted into the AatII site of pTC178, yielding pTC182 (for expression of LysM<sub>SafA</sub>-GFP-  
62 StrepTagII). This vector was used as template to introduce the alanine substitutions  
63 D10A, S11A, L12A, N30A or I39A at the LysM by site-directed mutagenesis, yielding  
64 plasmids pAI4, pAI1, pAI2, pAI5 and pAI3, respectively. For GFP-StrepTagII  
65 overproduction, the *gfp* gene was, digested with XbaI and Eco47III and cloned into the  
66 same sites of pASK-IBA3, generating pAI12. These vectors are then cloned in *E. coli*  
67 DH5 $\alpha$  for protein overproduction (strains AH4504-4509, AH4520 and AH4522). For  
68 overproduction of LysM<sub>SpoVID</sub>-StrepTagII, the coding region of the LysM domain of SpoVID  
69 was amplified, digested with XbaI and NcoI and inserted into pASK-IBA3. The resulting  
70 vector was transferred to *E. coli* BL21(DE3), resulting in strain AH5104.

71 **Strains for the overproduction of various SafA variants.** The vector pFN76 (1), a  
72 derivative of pACYCDuet-1 (Merk, Milipore) with the *safA* coding sequence, was used as  
73 template for insertion of alanine substitutions in LysM residues by site-directed  
74 mutagenesis. The resulting vectors, (see table S3) were used to transform *E. coli* BL21

**75** (DE3) (see table S1).

## 76 Supplemental Figure Legends

77 **Figure S1 - Accumulation of the various forms of SafA.** The WT, the complementation  
78 strain (WT<sup>C</sup>), and strains of a  $\Delta safA$  in-frame deletion mutant expressing alleles of *safA*  
79 coding for proteins with the indicated substitutions in the LysM domain at *amyE*, were  
80 induced to sporulate by the resuspension method. Samples were withdrawn at the  
81 indicated times, in hours, after resuspension (defined as the onset of sporulation), and  
82 whole cell lysates prepared. Proteins in the extracts were resolved by SDS-PAGE and the  
83 gel subject to immunoblotting with anti-SafA<sub>FL</sub> antibodies. The position of SafA<sub>FL</sub> and  
84 SafA<sub>C30</sub> is indicated by arrows. The substitutions are colour coded as described in the  
85 legend for figure 1: in red, the substitutions that cause early localization defects of SafA-  
86 YFP; in blue, the substitutions that cause localization defects late in morphogenesis. The  
87 position of molecular weight markers (in kDa) is shown in the left side of the panels.

88 **Figure S2 – Amino acid substitutions in SafA<sub>LysM</sub> affect the localization of the SafA-**  
89 **dependent YaaH-GFP. A:** The localization of YaaH-GFP was examined in the WT, the  
90  $\Delta safA$  in-frame deletion mutant and in strains producing forms of SafA with the D10A and  
91 I39A single amino acid substitutions. Samples were taken from sporulating cultures 6  
92 hours after the onset of sporulation induced by resuspension. The cells were stained with  
93 membrane dye FM4-64 and examined by phase contrast and fluorescence microscopy.  
94 Scale bar, 1  $\mu$ m. **B:** scoring of the percentage of sporangia showing the YaaH-GFP  
95 localization pattern depicted schematically. The scoring refers to the microscopy  
96 experiment represented in A.

97 **Figure S3 – Time-course of the localization of SafA-YFP in WT and *spoVE***  
98 **sporangia.** The localization of SafA-YFP was examined in the WT background and in  
99 cells bearing a *spoVE::tet* insertional allele. Samples were taken from sporulating cultures  
100 2, 4 and 6 hours after the onset of sporulation induced by resuspension. The cells were  
101 stained with membrane dye FM4-64 and examined by phase contrast and fluorescence  
102 microscopy. Scale bar, 1  $\mu$ m. The scoring of the percentage of sporangia showing the  
103 SafA-YFP localization pattern depicted schematically is shown below the microscopy  
104 images. Arrows: white, single cap; blue, double cap. See also Fig. 6A for cells examined  
105 at hour 8 of sporulation.  
106

107 **References**

- 108 1. Nunes F, Fernandes C, Freitas C, Marini E, Serrano M, Moran CP, Jr.,  
109 Eichenberger P, Henriques AO. 2018. SpoVID functions as a non-competitive  
110 hub that connects the modules for assembly of the inner and outer spore coat  
111 layers in *Bacillus subtilis*. *Mol Microbiol* doi:10.1111/mmi.14116.
- 112 2. Cutting SaHPB. 1990. Genetic Analysis. John Wiley and sons, Lta.
- 113 3. Nicholson WLaS, P. 1990. Sporulation, Germination and Outgrowth, p 391-  
114 450. *In* S.M. HCRaC (ed), *Molecular Biology Methods for Bacillus*. John Wiley  
115 & Sons Ltd, Chichester.
- 116 4. Karow ML, Piggot PJ. 1995. Construction of gusA transcriptional fusion vectors  
117 for *Bacillus subtilis* and their utilization for studies of spore formation. *Gene*  
118 163:69-74.
- 119 5. Real G, Fay A, Eldar A, Pinto SM, Henriques AO, Dworkin J. 2008.  
120 Determinants for the subcellular localization and function of a nonessential  
121 SEDS protein. *J Bacteriol* 190:363-76.
- 122 6. Wang KH, Isidro AL, Domingues L, Eskandarian HA, McKenney PT, Drew K,  
123 Grabowski P, Chua MH, Barry SN, Guan M, Bonneau R, Henriques AO,  
124 Eichenberger P. 2009. The coat morphogenetic protein SpoVID is necessary  
125 for spore encasement in *Bacillus subtilis*. *Mol Microbiol* 74:634-49.
- 126 7. Ozin AJ, Samford CS, Henriques AO, Moran CP, Jr. 2001. SpoVID guides  
127 SafA to the spore coat in *Bacillus subtilis*. *J Bacteriol* 183:3041-9.
- 128
- 129

## 130 Supplemental Tables

131

## 132 Table S1 - Bacterial strains.

| Strain                    | Relevant Genotype/Phenotype                                                                                                                                                         | Origin/Reference |
|---------------------------|-------------------------------------------------------------------------------------------------------------------------------------------------------------------------------------|------------------|
| <b><i>E. coli</i></b>     |                                                                                                                                                                                     |                  |
| DH5α                      | F <sup>-</sup> φ80 <i>lacZ</i> ΔM15 Δ( <i>lacZYA-argF</i> ) U169 <i>recA1 endA1 hsdR17</i> (rK <sup>-</sup> , mK <sup>+</sup> ) <i>phoA supE44 λ<sup>-</sup> thi-1 gyrA96 relA1</i> | Invitrogen       |
| BL21                      | F <sup>-</sup> <i>dcm ompT hsdS(rB<sup>-</sup> mB<sup>-</sup>) gal λ(DE3)</i>                                                                                                       | Promega          |
| AH2687                    | BL21(DE3)/pTC55 Cm <sup>r</sup> Amp <sup>r</sup>                                                                                                                                    | (7)              |
| AH2979                    | BL21(DE3)/pTC169 Cm <sup>r</sup> Amp <sup>r</sup>                                                                                                                                   | (7)              |
| AH4504                    | DH5α /pTC182 Amp <sup>r</sup>                                                                                                                                                       | This work        |
| AH4505                    | DH5α /pAI1 Amp <sup>r</sup>                                                                                                                                                         | "                |
| AH4506                    | DH5α /pAI2 Amp <sup>r</sup>                                                                                                                                                         | "                |
| AH4507                    | DH5α /pAI3 Amp <sup>r</sup>                                                                                                                                                         | "                |
| AH4508                    | DH5α /pAI4 Amp <sup>r</sup>                                                                                                                                                         | "                |
| AH4509                    | DH5α /pAI5 Amp <sup>r</sup>                                                                                                                                                         | "                |
| AH4522                    | DH5α /pAI12 Amp <sup>r</sup>                                                                                                                                                        | "                |
| AH5104                    | BL21(DE3)/ pFN45 Amp <sup>r</sup>                                                                                                                                                   | "                |
| AH5236                    | BL21(DE3)/ pFN76 Cm <sup>r</sup>                                                                                                                                                    | (1)              |
| AH5459                    | BL21(DE3)/ pFN132 Cm <sup>r</sup>                                                                                                                                                   | This work        |
| AH5460                    | BL21(DE3)/ pFN133Cm <sup>r</sup>                                                                                                                                                    | "                |
| AH5461                    | BL21(DE3)/ pFN134 Cm <sup>r</sup>                                                                                                                                                   | "                |
| AH5462                    | BL21(DE3)/ pMS550 Cm <sup>r</sup>                                                                                                                                                   | "                |
| AH5463                    | BL21(DE3)/ pMS551 Cm <sup>r</sup>                                                                                                                                                   | "                |
| <b><i>B. subtilis</i></b> |                                                                                                                                                                                     |                  |
| MB24                      | <i>trp2 metC3</i> , Spo <sup>+</sup>                                                                                                                                                | Lab. stock       |
| AH4634                    | <i>trp2 metC3 spoVID::spoVID-gfp</i> Sp <sup>r</sup>                                                                                                                                | "                |
| AH4808                    | <i>trp2 metC3 spoVID::spoVID-gfp</i> , Δ <i>spoVE::tet</i> Sp <sup>r</sup> Neo <sup>r</sup>                                                                                         | This work        |
| AH5429                    | <i>trp2 metC3 ΔsafA, amyE::safA-yfp::'amyE</i> , Δ <i>spoVE::tet</i> Neo <sup>r</sup>                                                                                               | "                |
| AH10297                   | <i>trp2 metC3 ΔsafA ΔamyE::cm</i>                                                                                                                                                   | "                |
| AH10302                   | <i>trp2 metC3 ΔsafA, amyE::safA::'amyE</i> Neo <sup>r</sup>                                                                                                                         | "                |
| AH10555                   | <i>trp2 metC3 ΔsafA, amyE::safA<sub>D10A</sub>::'amyE</i> Neo <sup>r</sup>                                                                                                          | "                |
| AH10556                   | <i>trp2 metC3 ΔsafA, amyE::safA<sub>S11A</sub>::'amyE</i> Neo <sup>r</sup>                                                                                                          | "                |
| AH10557                   | <i>trp2 metC3 ΔsafA, amyE::safA<sub>L12A</sub>::'amyE</i> Neo <sup>r</sup>                                                                                                          | "                |
| AH10558                   | <i>trp2 metC3 ΔsafA, amyE::safA<sub>N30A</sub>::'amyE</i> Neo <sup>r</sup>                                                                                                          | "                |
| AH10561                   | <i>trp2 metC3 ΔsafA, amyE::safA<sub>I39A</sub>::'amyE</i> Neo <sup>r</sup>                                                                                                          | "                |
| AH10487                   | <i>trp2 metC3 ΔsafA, amyE::safA-yfp::'amyE</i> Neo <sup>r</sup>                                                                                                                     | "                |
| AH10562                   | <i>trp2 metC3 ΔsafA, amyE::safA<sub>D10A</sub>-yfp::'amyE</i> Neo <sup>r</sup>                                                                                                      | "                |
| AH10563                   | <i>trp2 metC3 ΔsafA, amyE::safA<sub>S11A</sub>-yfp::'amyE</i> Neo <sup>r</sup>                                                                                                      | "                |
| AH10564                   | <i>trp2 metC3 ΔsafA, amyE::safA<sub>L12A</sub>-yfp::'amyE</i> Neo <sup>r</sup>                                                                                                      | "                |
| AH10565                   | <i>trp2 metC3 ΔsafA, amyE::safA<sub>I39A</sub>-yfp::'amyE</i> Neo <sup>r</sup>                                                                                                      | "                |
| AH10566                   | <i>trp2 metC3 ΔsafA, amyE::safA<sub>N30A</sub>-yfp::'amyE</i> Neo <sup>r</sup>                                                                                                      | "                |
| AH10612                   | <i>trp2 metC3 ΔsafA yaaH::yaaH-gfp</i> Sp <sup>r</sup>                                                                                                                              | "                |
| AH10613                   | <i>trp2 metC3 ΔsafA, amyE::safA::'amyE yaaH::yaaH-gfp</i> Sp <sup>r</sup> Neo <sup>r</sup>                                                                                          | "                |
| AH10614                   | <i>trp2 metC3 ΔsafA, amyE::safA<sub>D10A</sub>::'amyE yaaH::yaaH-gfp</i> Sp <sup>r</sup> Neo <sup>r</sup>                                                                           | "                |
| AH10616                   | <i>trp2 metC3 ΔsafA, amyE::safA<sub>L12A</sub>::'amyE yaaH::yaaH-gfp</i> Sp <sup>r</sup> Neo <sup>r</sup>                                                                           | "                |

133

134

135

<sup>a</sup>Amp<sup>r</sup>, ampicilin resistant; Sp<sup>r</sup>, spectinomycin resistant; Nm<sup>r</sup>, neomycin resistant; Cm<sup>r</sup>, chloramphenicol resistant; Erm<sup>r</sup>, eritromycin resistant; Tet<sup>r</sup> tetracycline resistant.



136 **Table S2 – Oligonucleotides used in this study.**

| Primer        | Sequence (5' to 3') <sup>a</sup>                               |
|---------------|----------------------------------------------------------------|
| safA-364D     | GCAAGTCGACAATCGGGACAGAAATGAATCTTG                              |
| safA+135R     | CCCGGGTCATACTGAGGCGATACTATTTTCATTCCAGGCATGATTAGTC              |
| safA+748D     | CATGCCTGGAATGAAAATAGTATCGCCTCAGTATGACCCGGGTTATG                |
| safA+1250R    | GGGAATTCTAAGCGTGTCAAGTTCTCTCCATTTG                             |
| safA-IBA3d    | CAAAAATCTAGATAACGAGGGCAAAAAATGAAAATCCATATCGTTCAAAAAGGCG        |
| safA-IBA3r    | CTGAGACCATGGACGTCCTCTTCTGACGGCACTTTTATTTTCATTCC                |
| gfpmut2+4D    | CCGACGTCAGTAAAGGAGAAGAAC                                       |
| gfpmut2+714R  | <u>CCGACGTC</u> TTTGTATAGTTCATCC                               |
| gfpinpASKDir  | CAAAAATCTAGATAACGAGGGCAAAAAATGAGTAAAGGAGAAGAACTTTTCACTG<br>GAG |
| gfpinpASKRev  | TGCCAGCGCTTTTGTATAGTTCATCCATGCCATGTG                           |
| safAD10A-d    | GAAAATCCATATCGTTCAAAAAGGCGCTTCGCTCTGGAAAATAGCTG                |
| safAD10A-r    | CAGCTATTTTCCAGAGCGAAGCGCCTTTTTGAACGATATGGATTTTC                |
| safAS11A-d    | GAAAATCCATATCGTTCAAAAAGGCGATGCGCTCTGGAAAATAGCTGAAAAGTAC        |
| safAS11A-r    | GTACTTTTTCAGCTATTTTCCAGAGCGCATCGCCTTTTTGAACGATATGGATTTTC       |
| safAL12A-d    | CCATATCGTTCAAAAAGGCGATTTCGGCCTGGAAAATAGCTGAAAAGTACGG           |
| safAL12A-r    | CCGACTTTTTCAGCTATTTTCCAGGCCGAATCGCCTTTTTGAACGATATGG            |
| safAN30A-d    | GATGTTGAGGAAGTAAAAAACTCGCTACACAGCTTAGCAATCCAGAC                |
| safAI39A-d    | GTCTGGATTGCTAAGCTGTGTAGCGAGTTTTTTCACTTCTCAACATC                |
| safAI39A-r    | CAGCTTAGCAATCCAGACTTAGCCATGCCTGGAATGAAAATAAAAGTGCCG            |
| VID-LysM1761D | GCTCTAGATAACGAGGGCAAAAAATGAAAATTTGTATTGTGCAGCAGG               |
| VID-LysM1928R | GCCCATGGACGTCGCATGGCTATTTTTATATTGAGG                           |

<sup>a</sup> Restriction sites are underlined

137  
138

139 **Table S3 – Plasmids**

| Plasmid | Relevant features                                                                       |
|---------|-----------------------------------------------------------------------------------------|
| pAI1    | pASK-IBA3 derivative with <i>safA</i> <sub>LysM S11A</sub> - <i>gfp</i>                 |
| pAI2    | pASK-IBA3 derivative with <i>safA</i> <sub>LysM L12A</sub> - <i>gfp</i>                 |
| pAI3    | pASK-IBA3 derivative with <i>safA</i> <sub>LysM I39A</sub> - <i>gfp</i>                 |
| pAI4    | pASK-IBA3 derivative with <i>safA</i> <sub>LysM D10A</sub> - <i>gfp</i>                 |
| pAI5    | pASK-IBA3 derivative with <i>safA</i> <sub>LysM N30A</sub> - <i>gfp</i>                 |
| pAI12   | pASK-IBA3 derivative with <i>gfp</i>                                                    |
| pCF72   | pUC18 derivative to perform an <i>in frame</i> deletion in <i>safA</i>                  |
| pCF75   | pMLK83 derivative for insertion of <i>safA</i> at <i>amyE</i> locus                     |
| pCF149  | pMLK83 derivative for insertion of <i>safA-yfp</i> at <i>amyE</i> locus                 |
| pCF181  | pMLK83 derivative for insertion of <i>safA</i> <sub>D10A</sub> at <i>amyE</i> locus     |
| pCF182  | pMLK83 derivative for insertion of <i>safA</i> <sub>S11A</sub> at <i>amyE</i> locus     |
| pCF183  | pMLK83 derivative for insertion of <i>safA</i> <sub>L12A</sub> at <i>amyE</i> locus     |
| pCF184  | pMLK83 derivative for insertion of <i>safA</i> <sub>I39A</sub> at <i>amyE</i> locus     |
| pCF185  | pMLK83 derivative for insertion of <i>safA</i> <sub>N30A</sub> at <i>amyE</i> locus     |
| pCF186  | pMLK83 derivative for insertion of <i>safA</i> <sub>D10A-yfp</sub> at <i>amyE</i> locus |
| pCF187  | pMLK83 derivative for insertion of <i>safA</i> <sub>S11A-yfp</sub> at <i>amyE</i> locus |
| pCF188  | pMLK83 derivative for insertion of <i>safA</i> <sub>L12A-yfp</sub> at <i>amyE</i> locus |
| pCF189  | pMLK83 derivative for insertion of <i>safA</i> <sub>I39A-yfp</sub> at <i>amyE</i> locus |
| pCF190  | pMLK83 derivative for insertion of <i>safA</i> <sub>N30A-yfp</sub> at <i>amyE</i> locus |
| pFN45   | pASK-IBA3 derivative with <i>spoVID</i> <sub>LysM</sub>                                 |
| pFN76   | pACYDuet-1 derivative with <i>safA</i>                                                  |
| pFN132  | pACYDuet-1 derivative with <i>safA</i> <sub>D10A</sub>                                  |
| pFN133  | pACYDuet-1 derivative with <i>safA</i> <sub>N30A</sub>                                  |
| pFN134  | pACYDuet-1 derivative with <i>safA</i> <sub>I390A</sub>                                 |
| pMS550  | pACYDuet-1 derivative with <i>safA</i> <sub>S11A</sub>                                  |
| pMS551  | pACYDuet-1 derivative with <i>safA</i> <sub>L12A</sub>                                  |
| pTC55   | pGEX-4T3 derivative for GST overexpression                                              |
| pTC182  | pASK-IBA3 derivative with <i>safA</i> <sub>LysM</sub> - <i>gfp</i>                      |
| pOZ169  | pGEX-4T3 derivative for GST-SpoVID overexpression                                       |

140

141

142 **Table S4 – Spore heat and lysozyme resistance of various strains.**143  
144

|            | Titer of spores (CFU/ml*) |                     |                     |                     |                     |                     |                     |                     |
|------------|---------------------------|---------------------|---------------------|---------------------|---------------------|---------------------|---------------------|---------------------|
|            | WT                        | WT <sup>c</sup>     | $\Delta safA$       | D10A                | S11A                | L12A                | N30A                | I39A                |
| Viable**   | 3.6x10 <sup>7</sup>       | 6.2x10 <sup>7</sup> | 2.2x10 <sup>7</sup> | 4.4x10 <sup>7</sup> | 7.8x10 <sup>7</sup> | 3.8x10 <sup>7</sup> | 4.8x10 <sup>7</sup> | 6.9x10 <sup>7</sup> |
| Heat**     | 1.7x10 <sup>7</sup>       | 1.7x10 <sup>7</sup> | 9.2x10 <sup>6</sup> | 2.5x10 <sup>7</sup> | 6.3x10 <sup>7</sup> | 1.1x10 <sup>7</sup> | 1.1x10 <sup>7</sup> | 3.8x10 <sup>7</sup> |
| Lysozyme** | 1.6x10 <sup>7</sup>       | 1.5x10 <sup>7</sup> | 7.5x10 <sup>6</sup> | 1.6x10 <sup>7</sup> | 4.4x10 <sup>7</sup> | 1.5x10 <sup>7</sup> | 1.3x10 <sup>7</sup> | 2.8x10 <sup>7</sup> |

145  
146  
147

\* Colony-forming units; \*\* Viable, heat and lysozyme resistant CFU's/ml; WT<sup>c</sup>, completion strain ( $\Delta safA$  mutant with the WT *safA* allele at *amyE*).

148  
149  
150  
151  
152

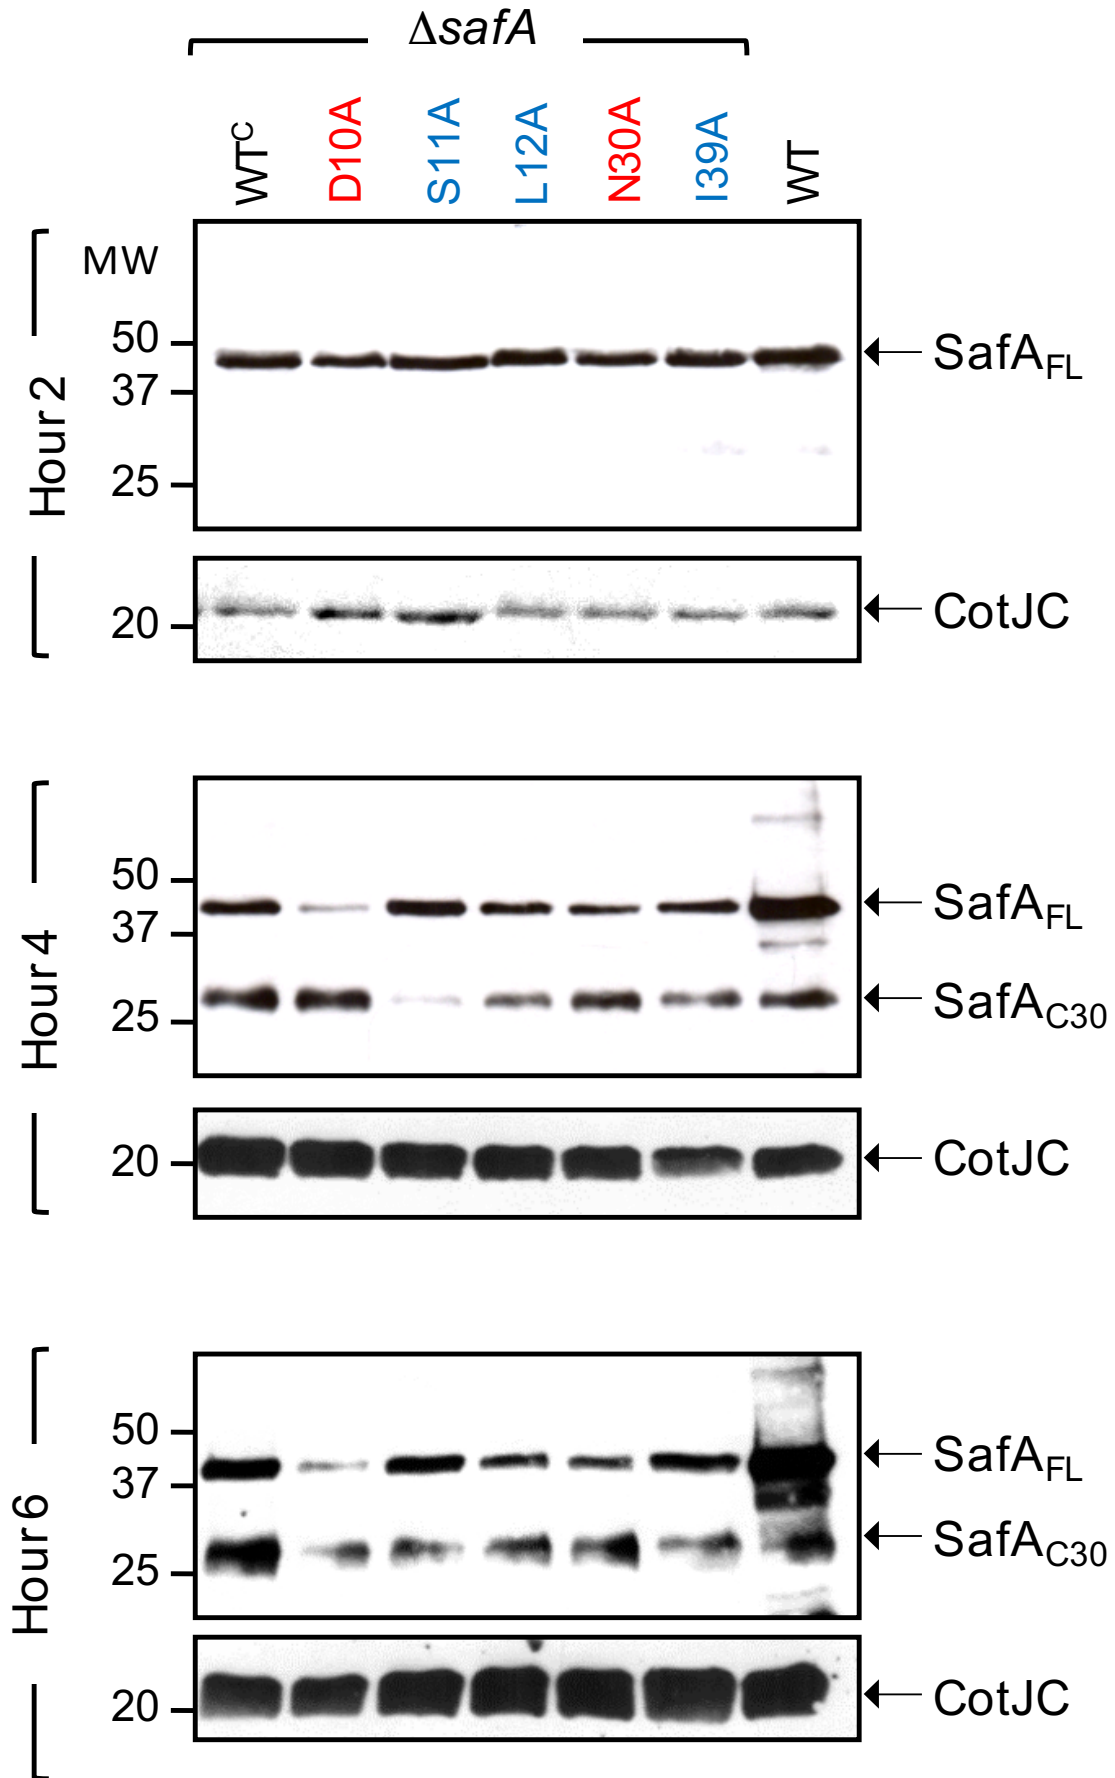

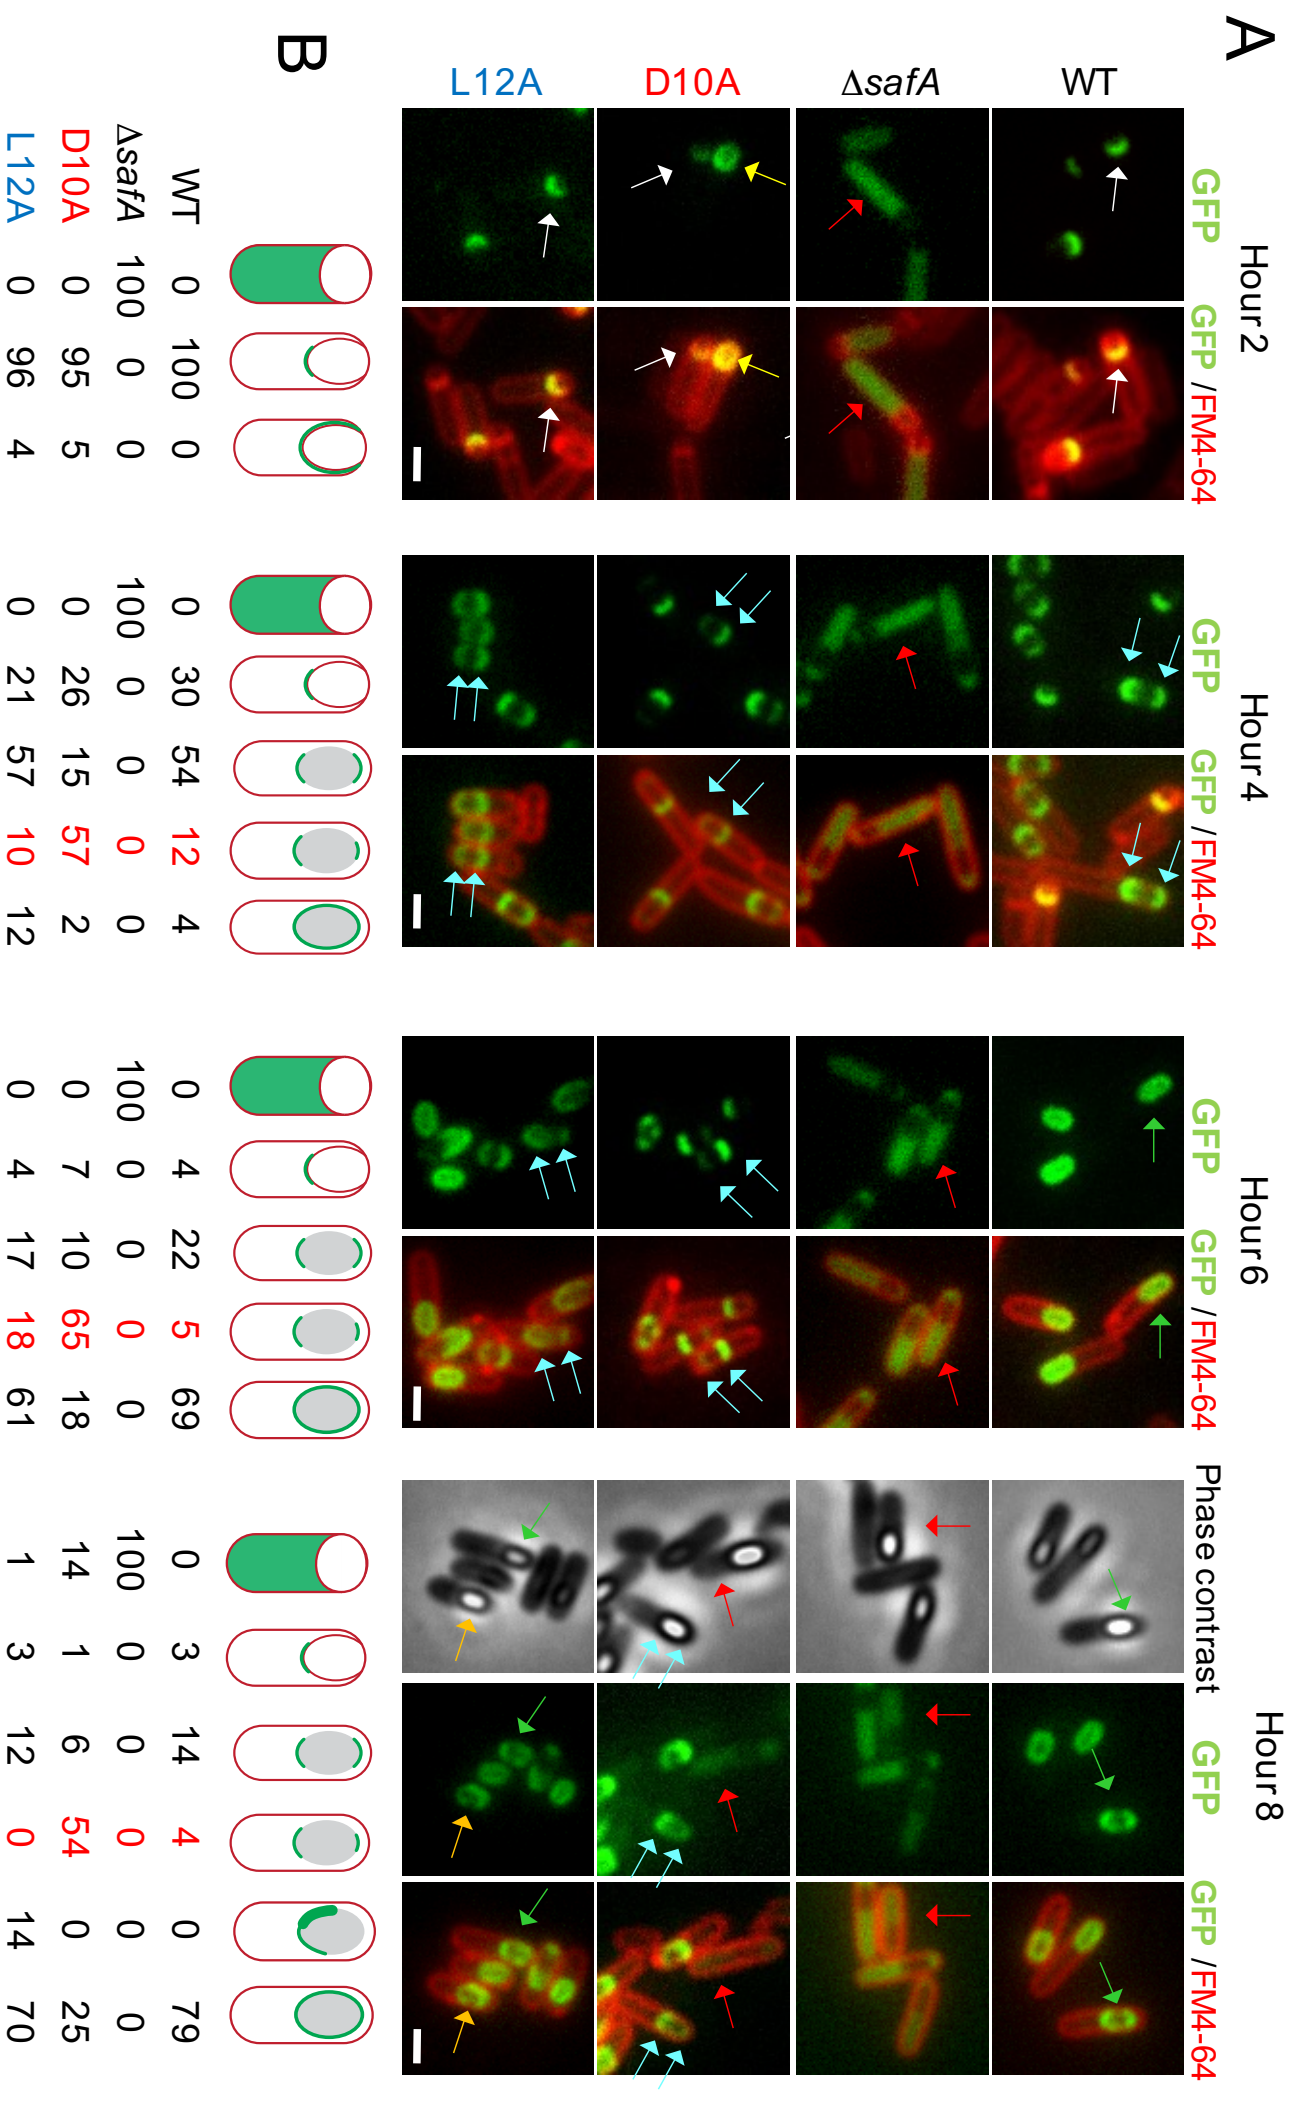

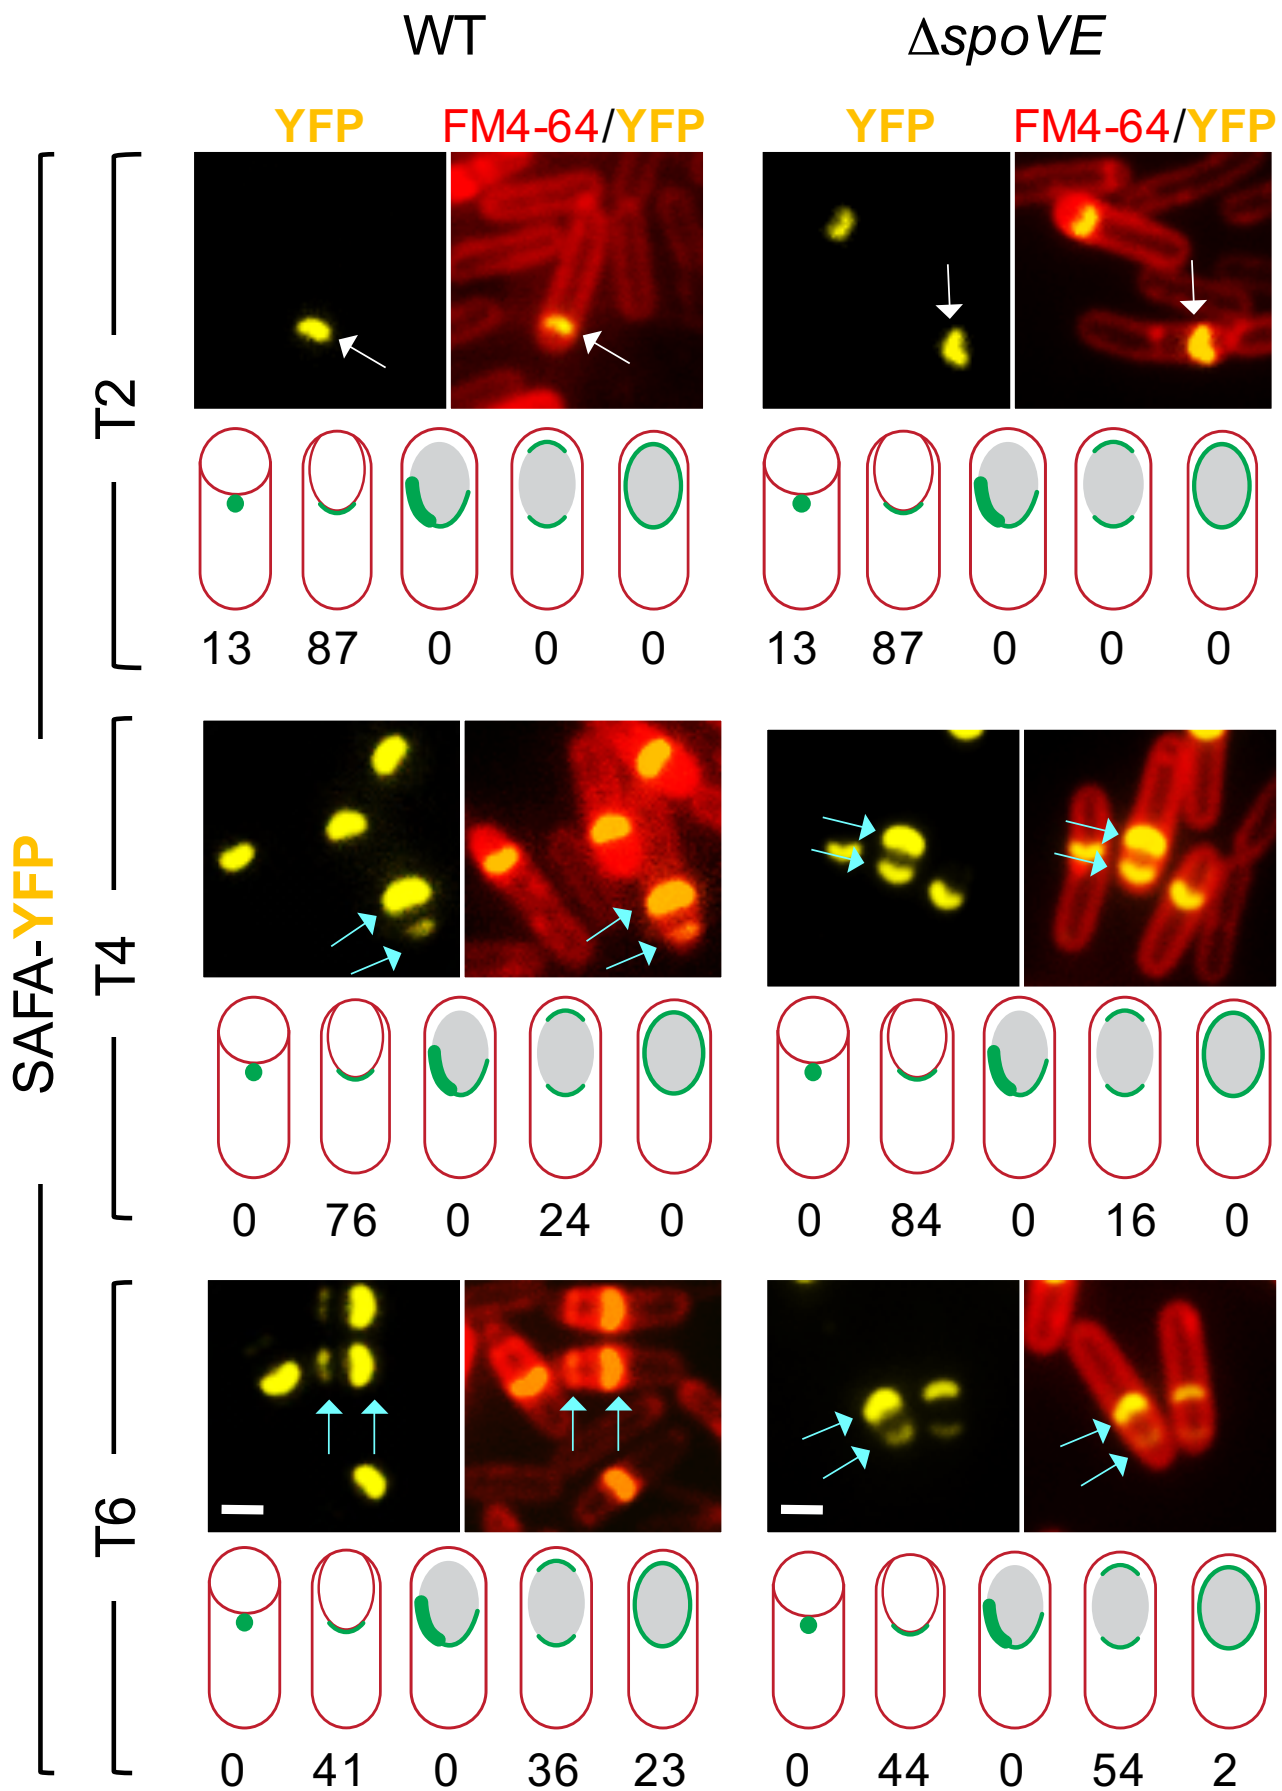

Supplement: ca3f68c9c32053d1f36c008a9a66622d_JB.00642-18-s0001.pdf [file ca3f68c9c32053d1f36c008a9a66622d_JB.00642-18-s0001.pdf]
